# Supplementary material for: Correction of Anemia in Chronic Kidney Disease With Angelica sinensis Polysaccharide via Restoring EPO Production and Improving Iron Availability
Source: PubMed Central journal article supplement (PMC6079227; doi:10.3389/fphar.2018.00803), 2018-07-31

# Uncropped images of the original western blots

## Correction of anemia in chronic kidney disease with *Angelica sinensis* polysaccharide via restoring EPO production and improving iron availability

Kaiping Wang<sup>1</sup>, Jun Wu<sup>1</sup>, Jingya Xu<sup>1</sup>, Saisai Gu<sup>1</sup>, Qiang Li<sup>2</sup>, Peng Cao<sup>2</sup>, Mingming Li<sup>2</sup>, Yu Zhang<sup>2</sup>, Fang Zeng<sup>2\*</sup>

<sup>1</sup>*Hubei Key Laboratory of Nature Medicinal Chemistry and Resource Evaluation, Tongji Medical College of Pharmacy, Huazhong University of Science and Technology, Wuhan, China*

<sup>2</sup>*Department of Pharmacy, Union Hospital of Huazhong University of Science and Technology, Wuhan, China*

\*Corresponding author at: Department of Pharmacy, Union Hospital of Huazhong University of Science and Technology, No. 1277, Jiefang Road, 430022, Wuhan, China

*E-mail address:* fangzengwhuh [@163.com](mailto:fangzengwhuh@163.com) (Fang Zeng)

**Fig. 2A**

**HIF-1 $\alpha$**

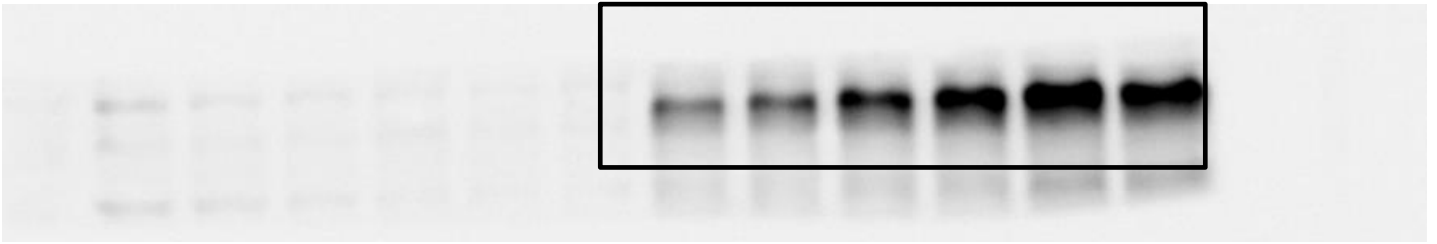

**HIF-2 $\alpha$**

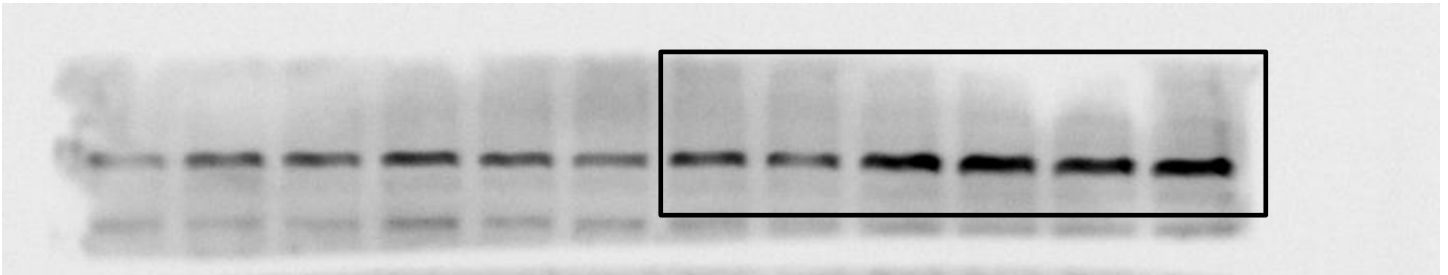

**$\beta$ -actin**

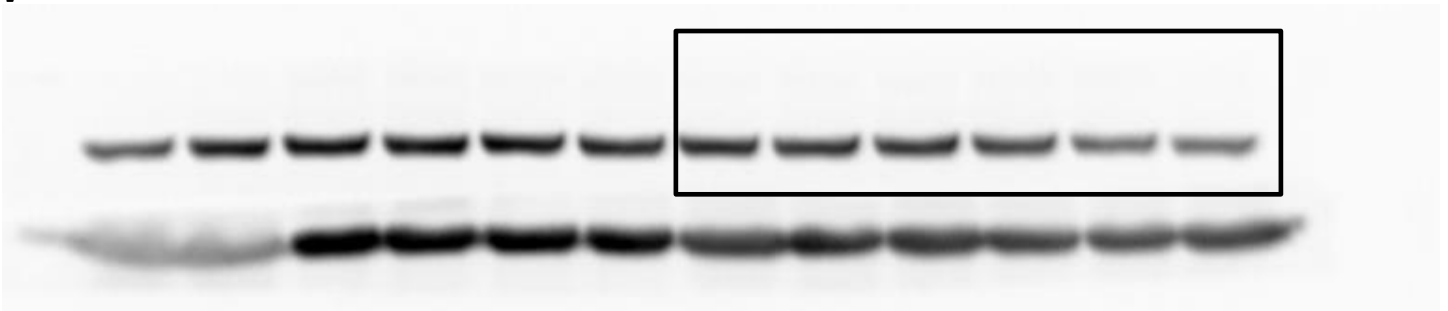

**Fig. 2E**

**HIF-1 $\alpha$**

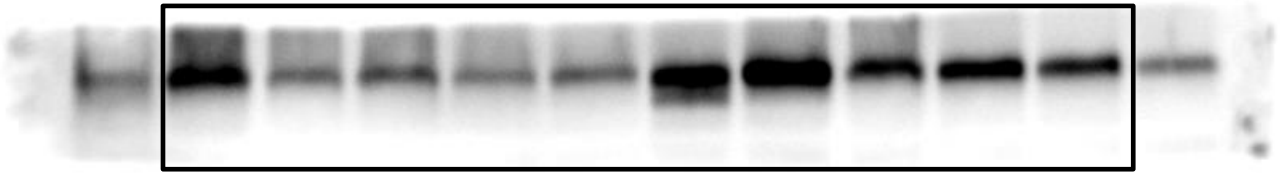

**$\beta$ -actin**

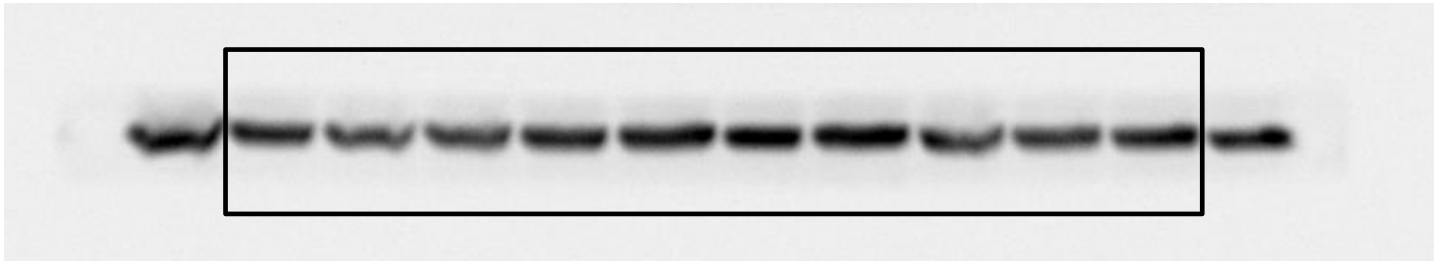

**HIF-2 $\alpha$**

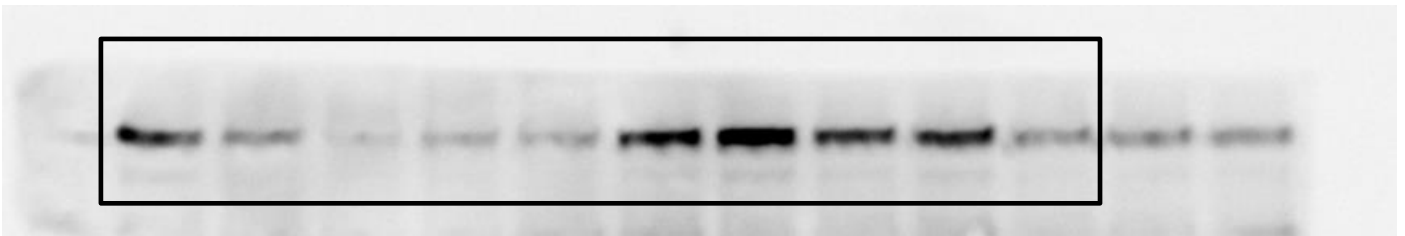

**$\beta$ -actin**

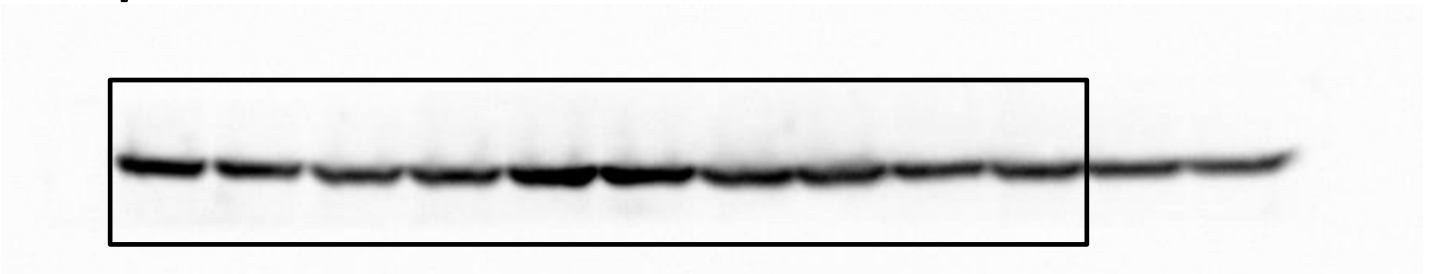

**Fig. 3A**

**GATA2**

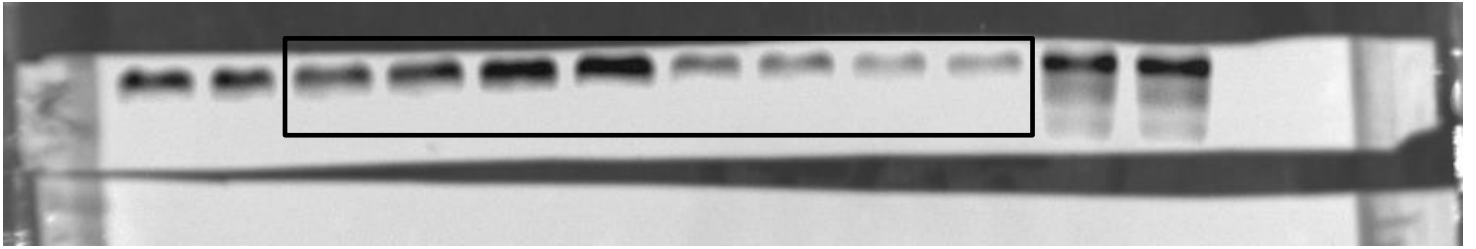

**Histone H3.1**

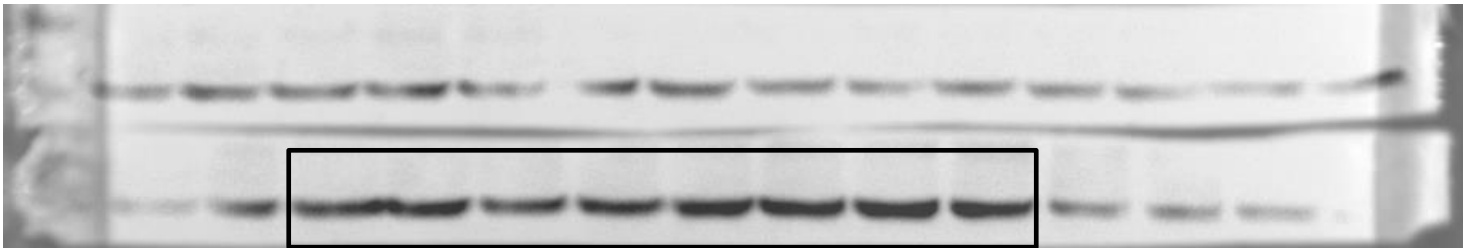

**Fig. 3D**

**GATA2**

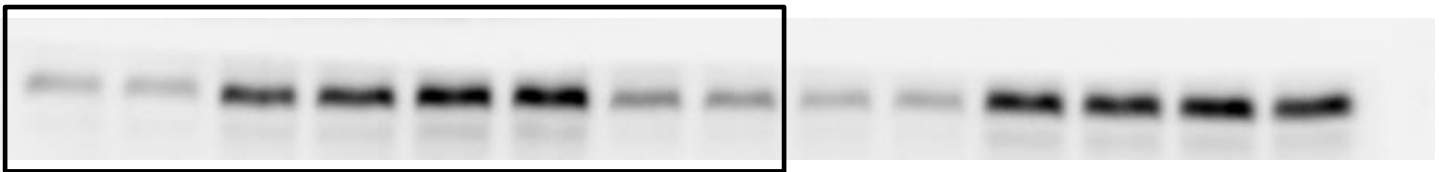

**NF- $\kappa$ B**

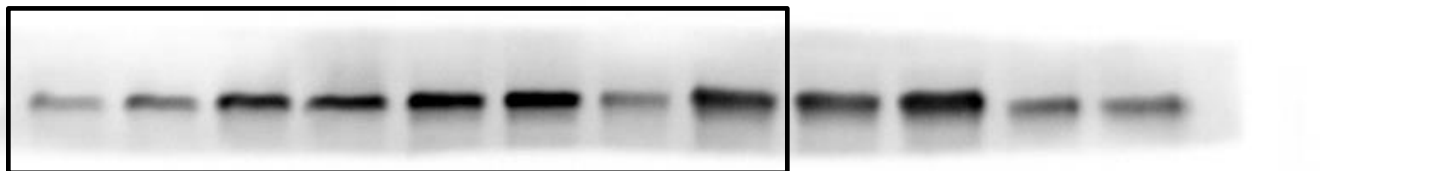

**Histone H3.1**

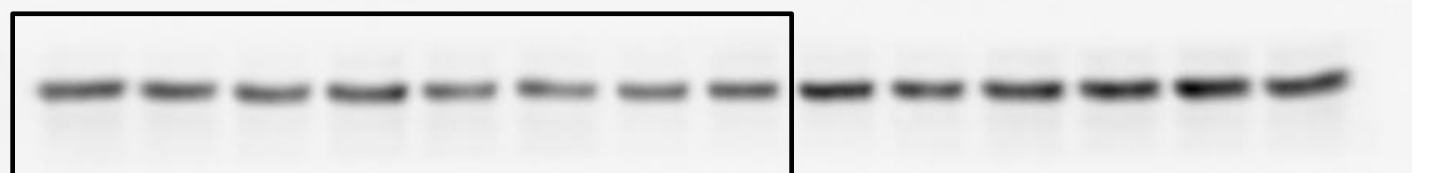

**Fig 6.D**

**HIF-1 $\alpha$**

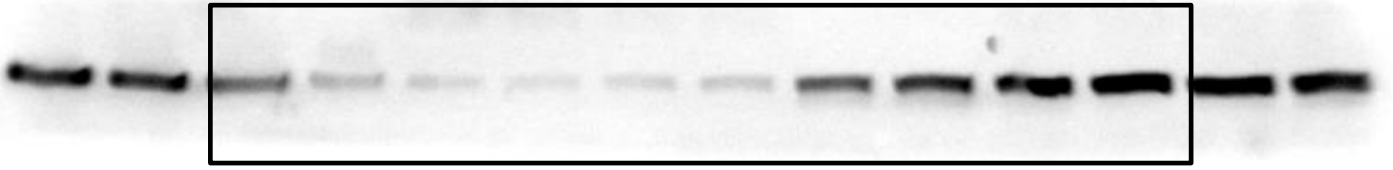

**HIF-2 $\alpha$**

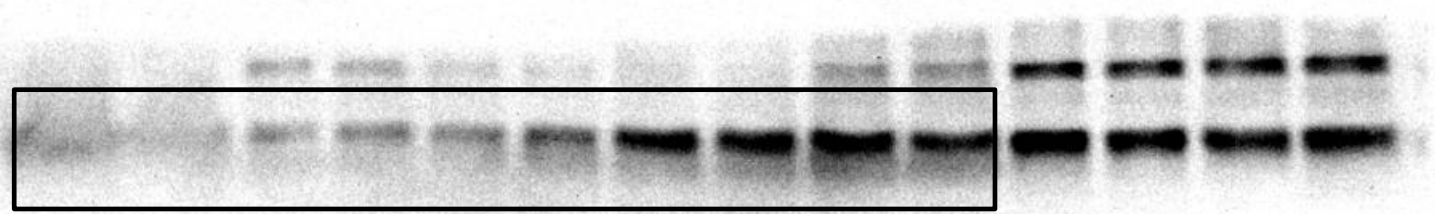

**NF- $\kappa$ B**

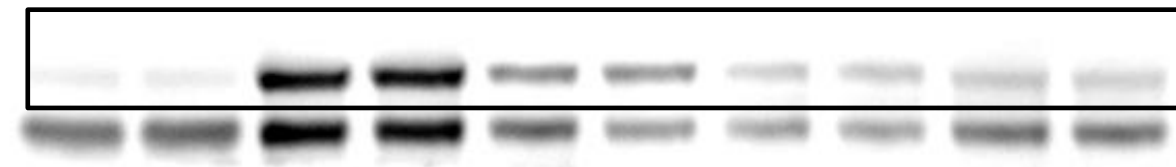

**GATA2**

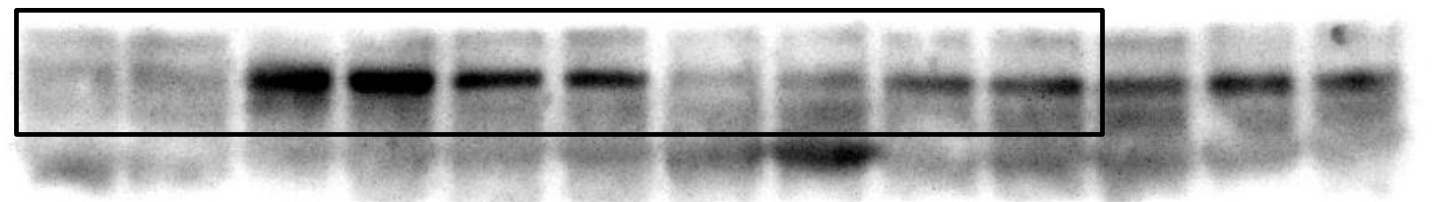

**$\beta$ -actin**

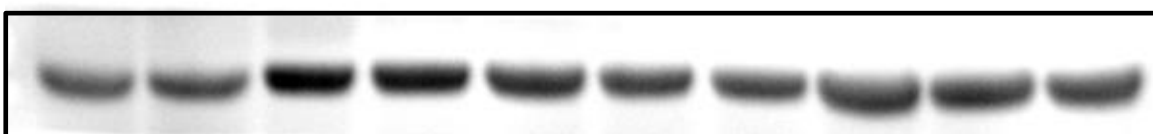

**Fig 6.E**

**HIF-1 $\alpha$**

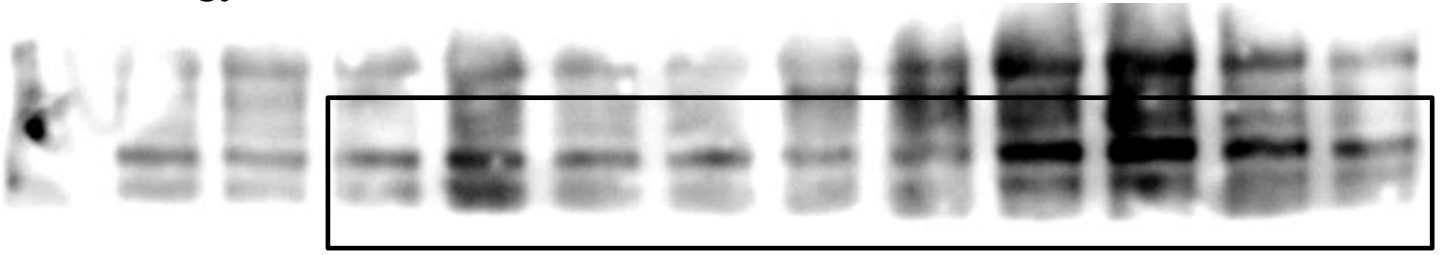

**HIF-2 $\alpha$**

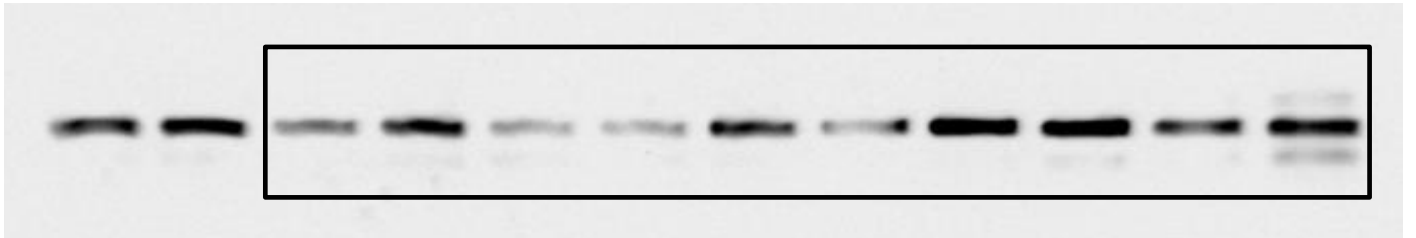

**NF- $\kappa$ B**

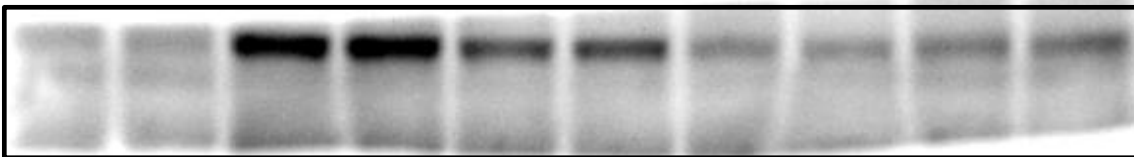

**GATA2**

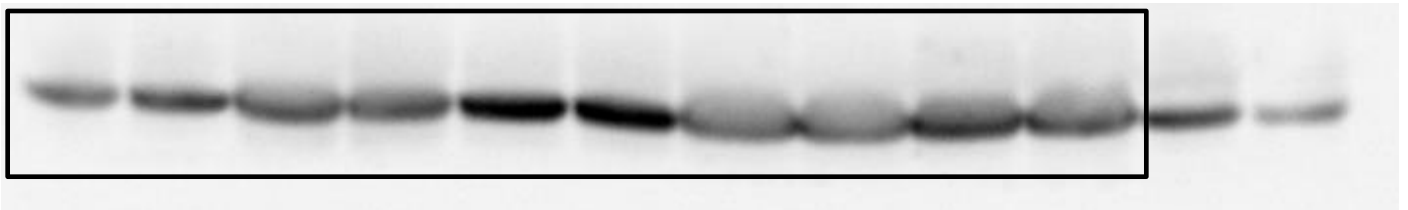

**$\beta$ -actin**

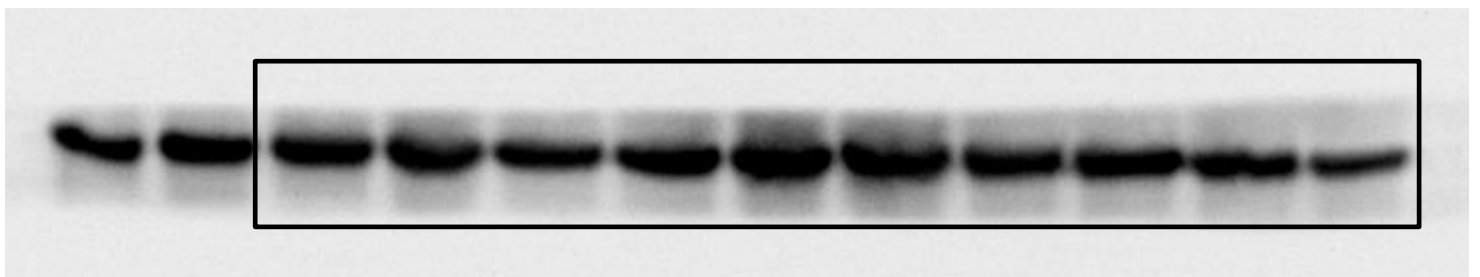

**Fig. 7B**

**p-JAK2**

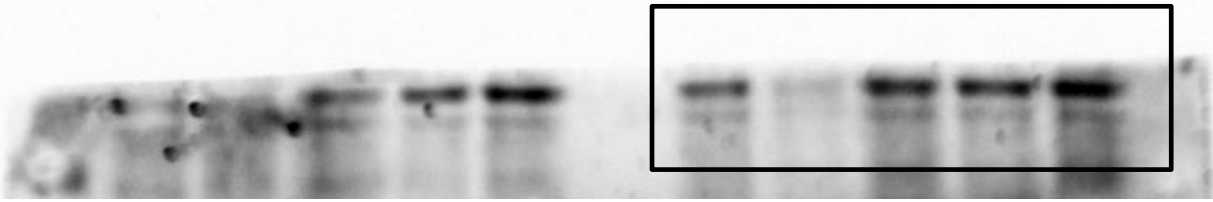

**p-STAT5**

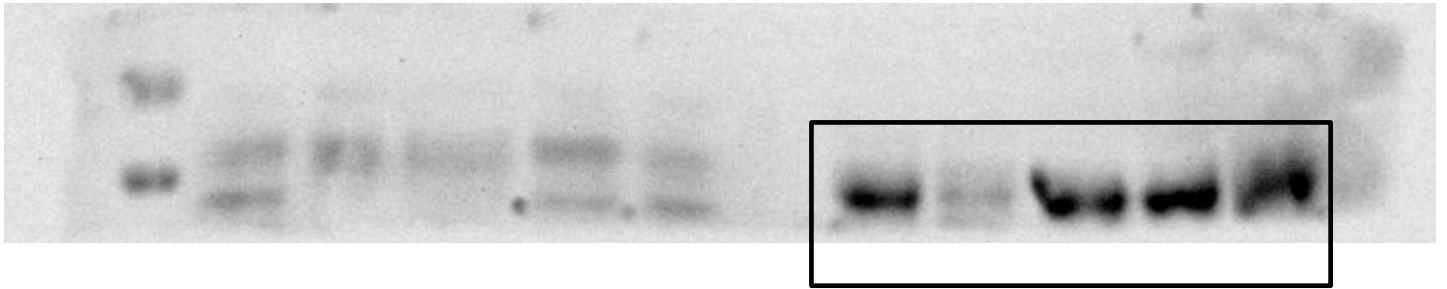

**p-PI3K**

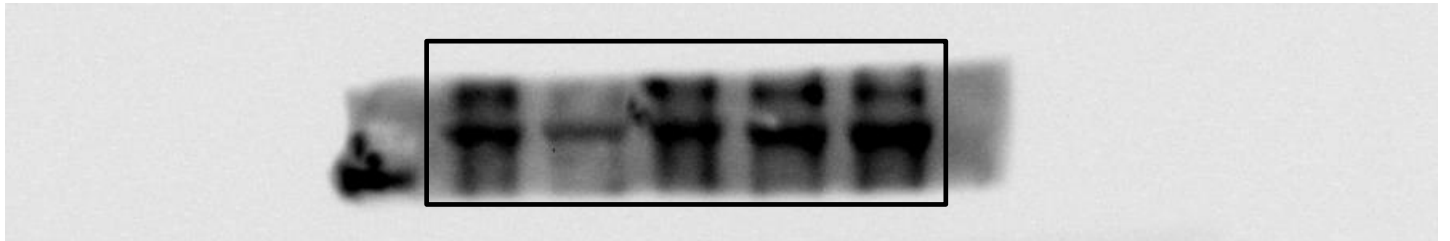

**p-Akt**

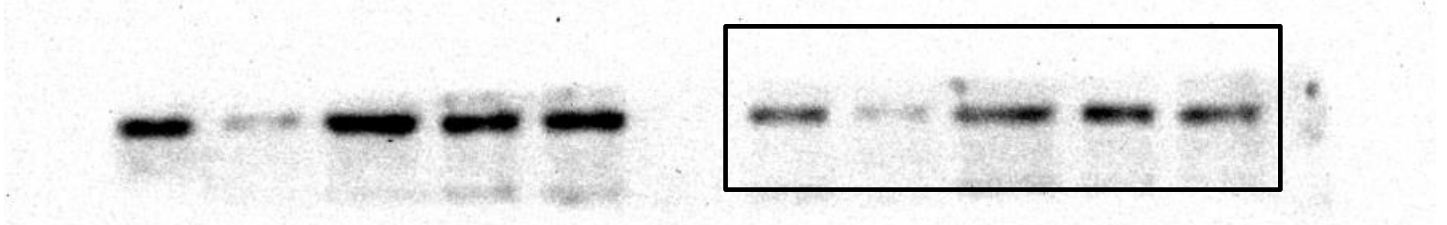

**$\beta$ -actin**

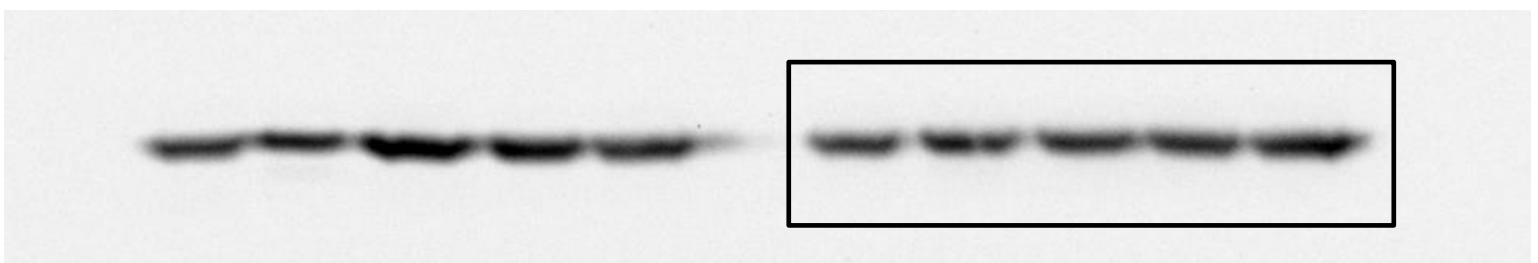

**Fig 8.D**

**p-STAT3**

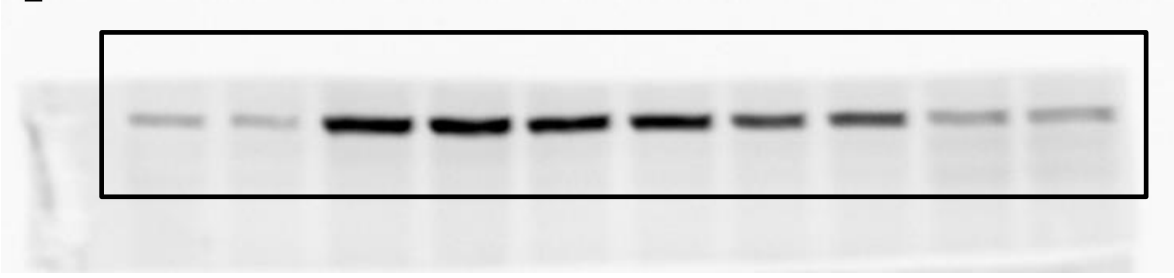

**p-SMAD1/5/8**

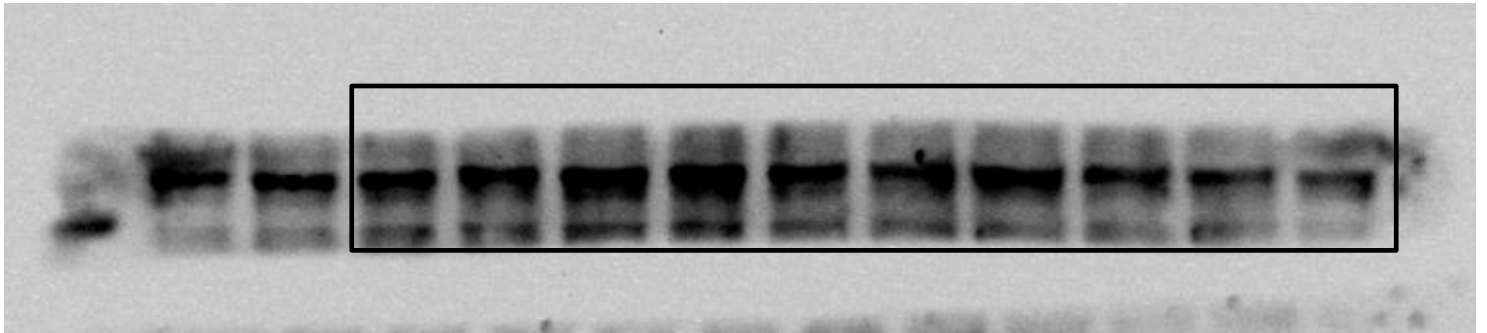

**$\beta$ -actin**

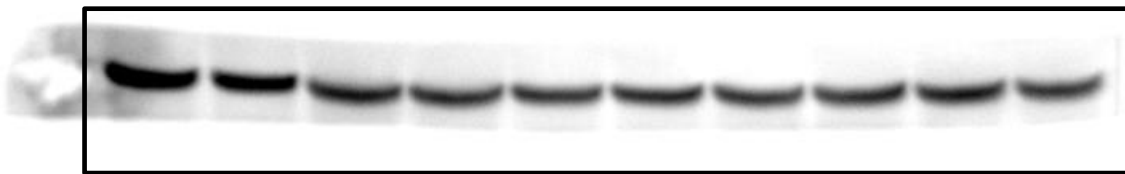



# Fig 8.F

## Spleen

ferritin

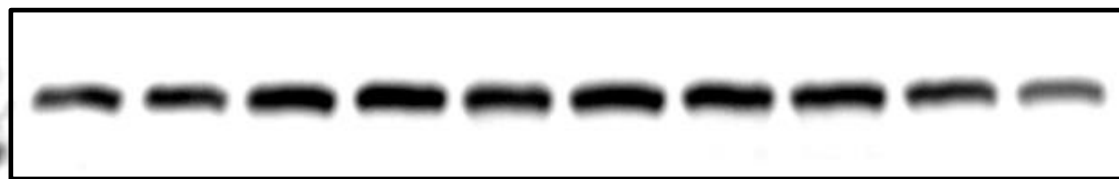

ferroportin

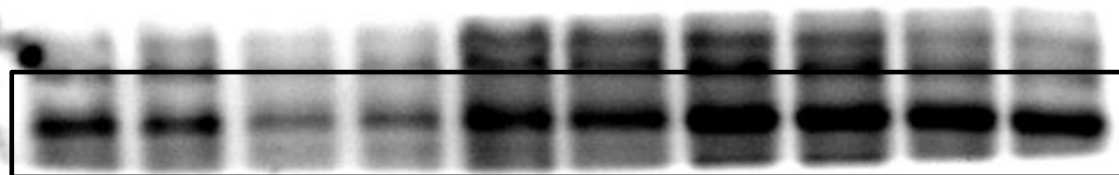

$\beta$ -actin

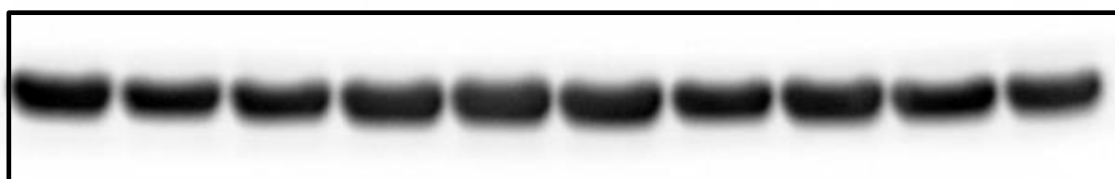

## Liver

ferritin

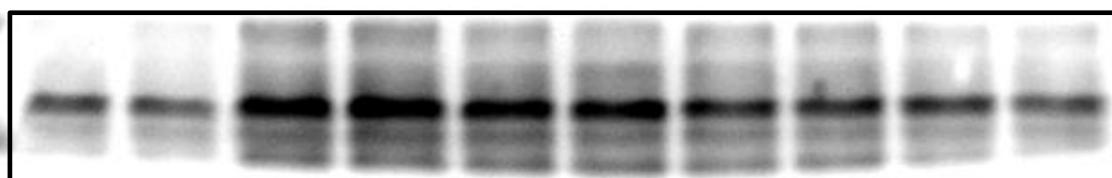

ferroportin

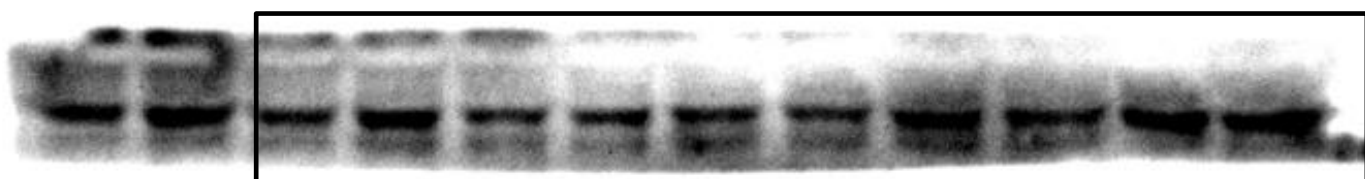

$\beta$ -actin

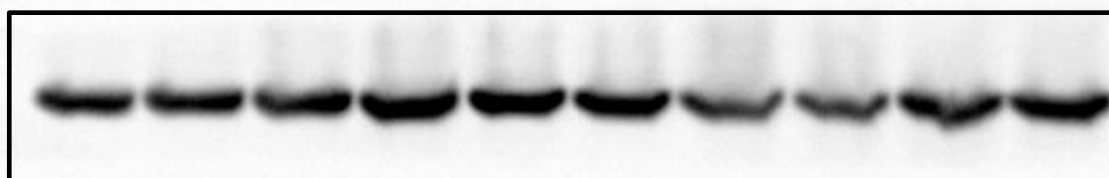

# Supplemental Fig. S2

**NF- $\kappa$ B**

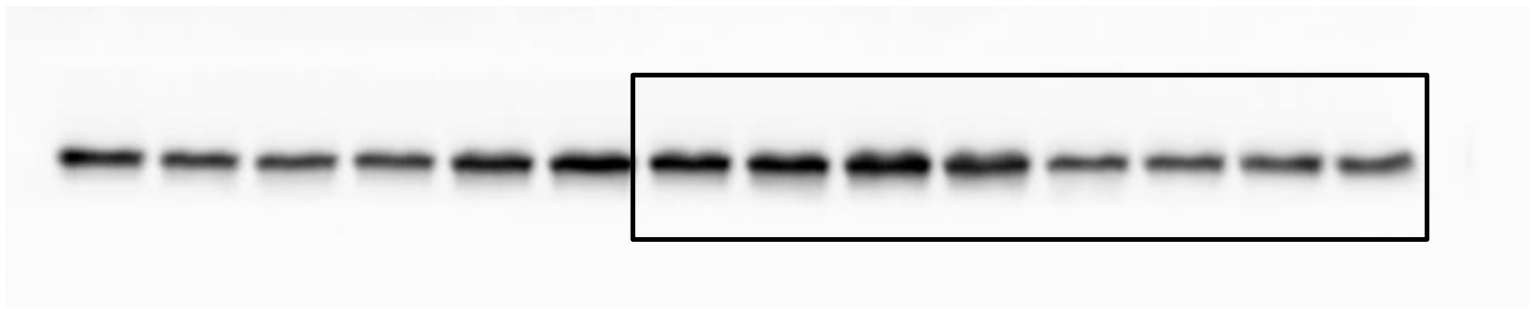

**GATA2**

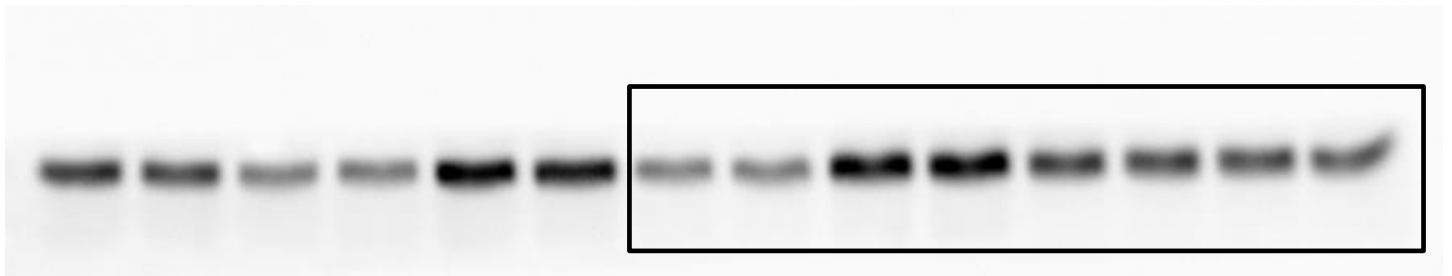

**Histone H3.1**

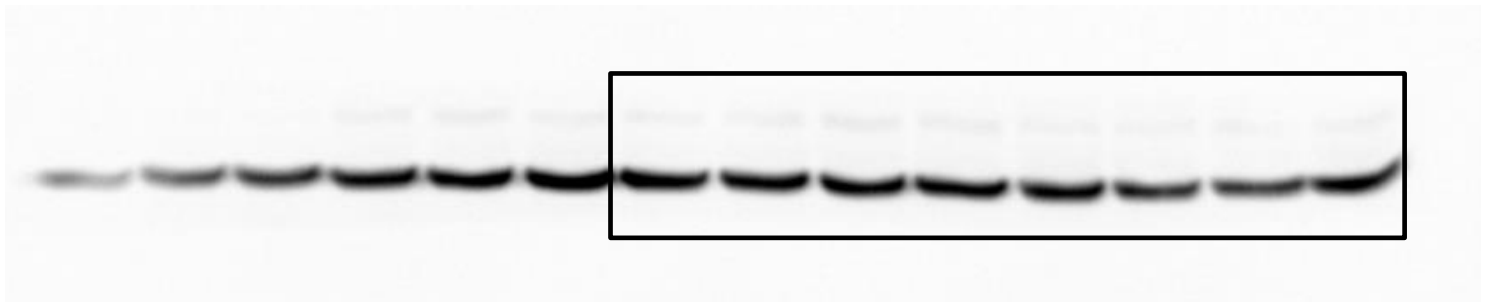

**Fig. 2A**

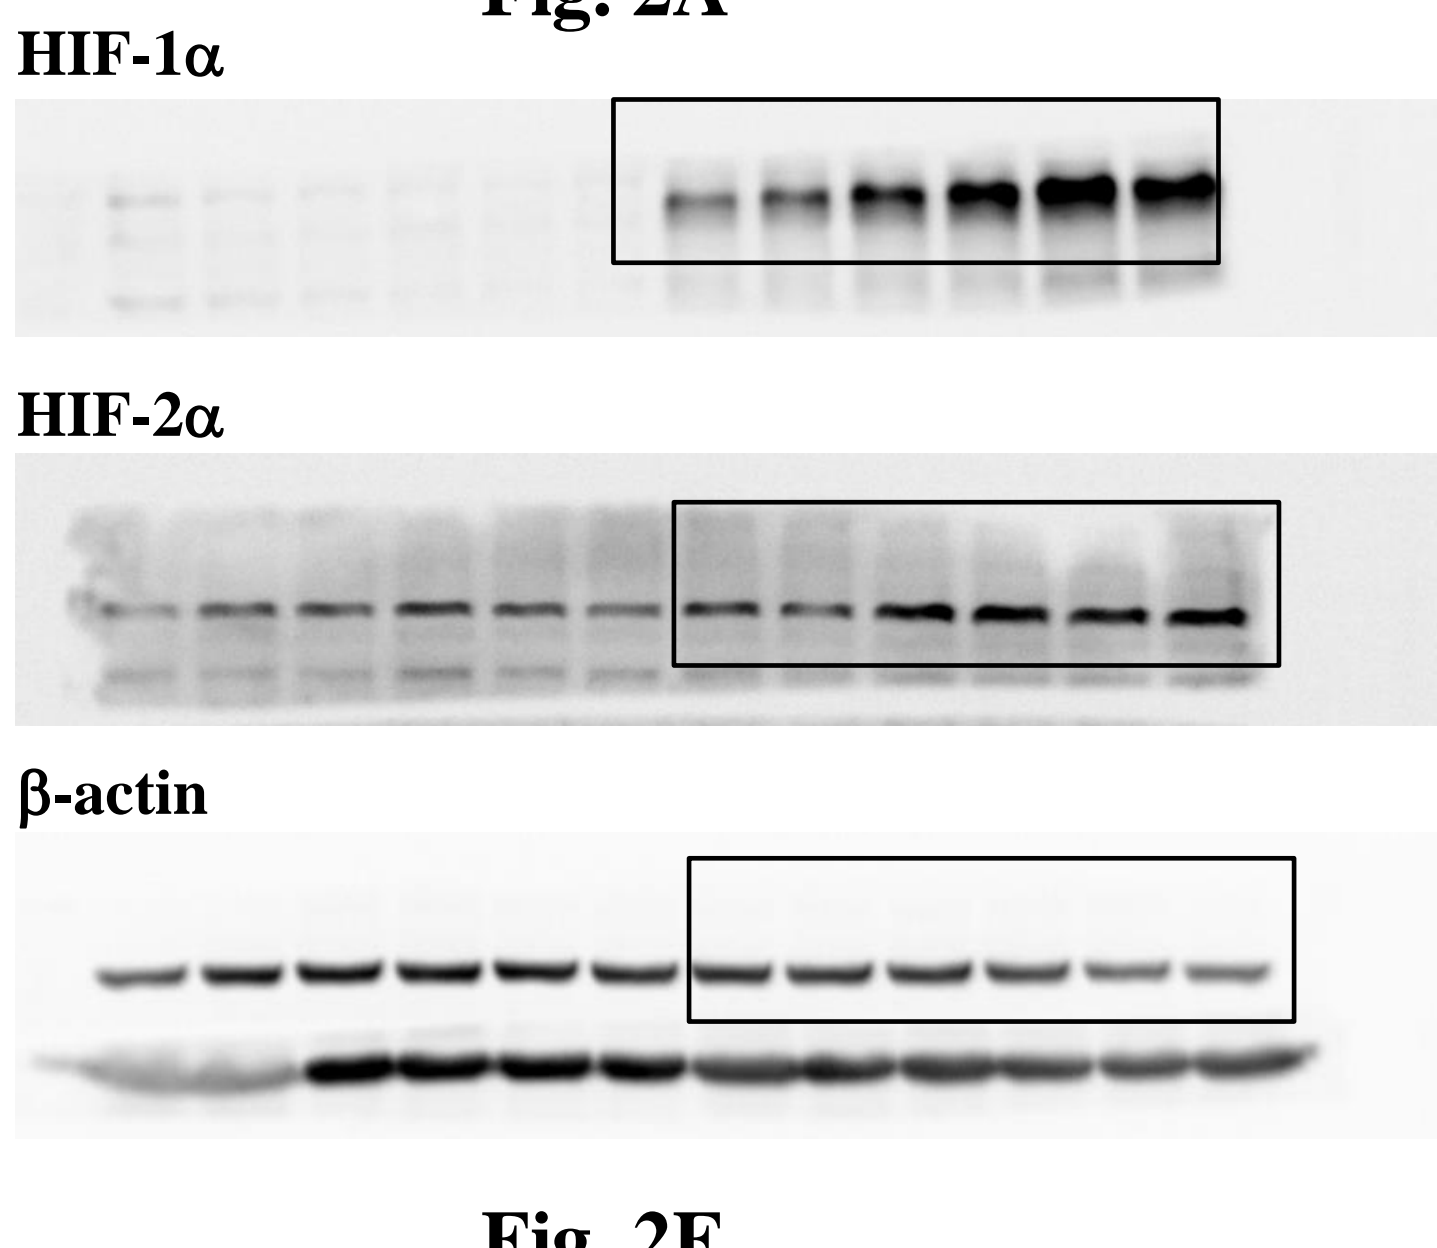

**Fig. 2E**

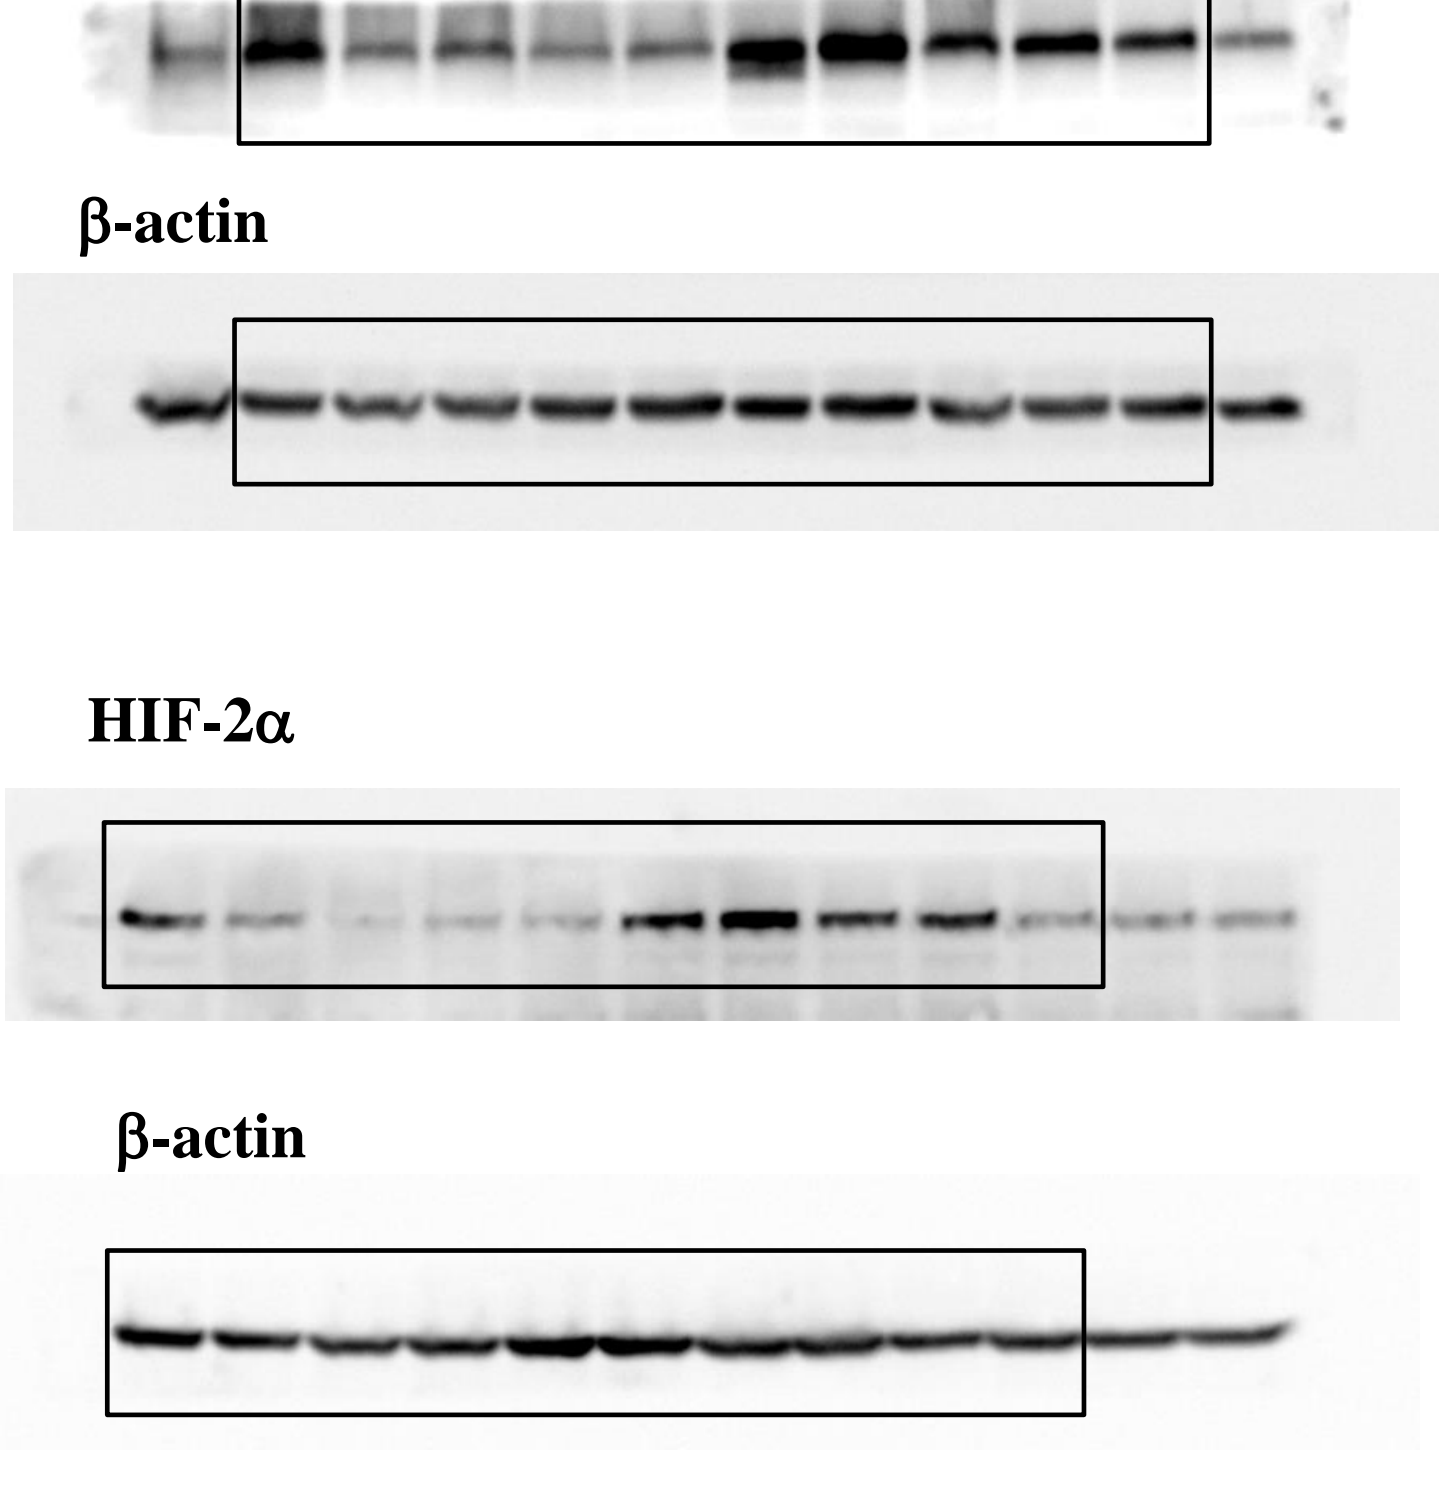

**Fig. 3A**

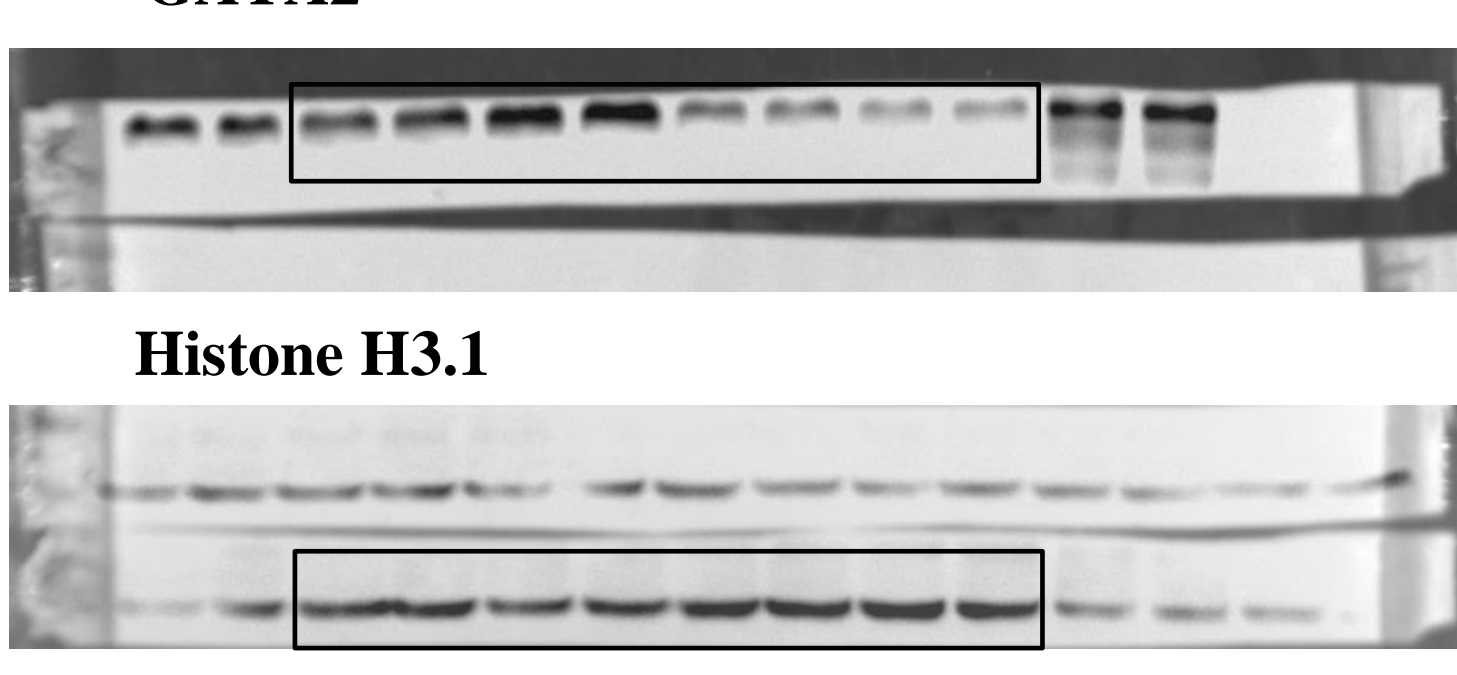

**Fig. 3D**

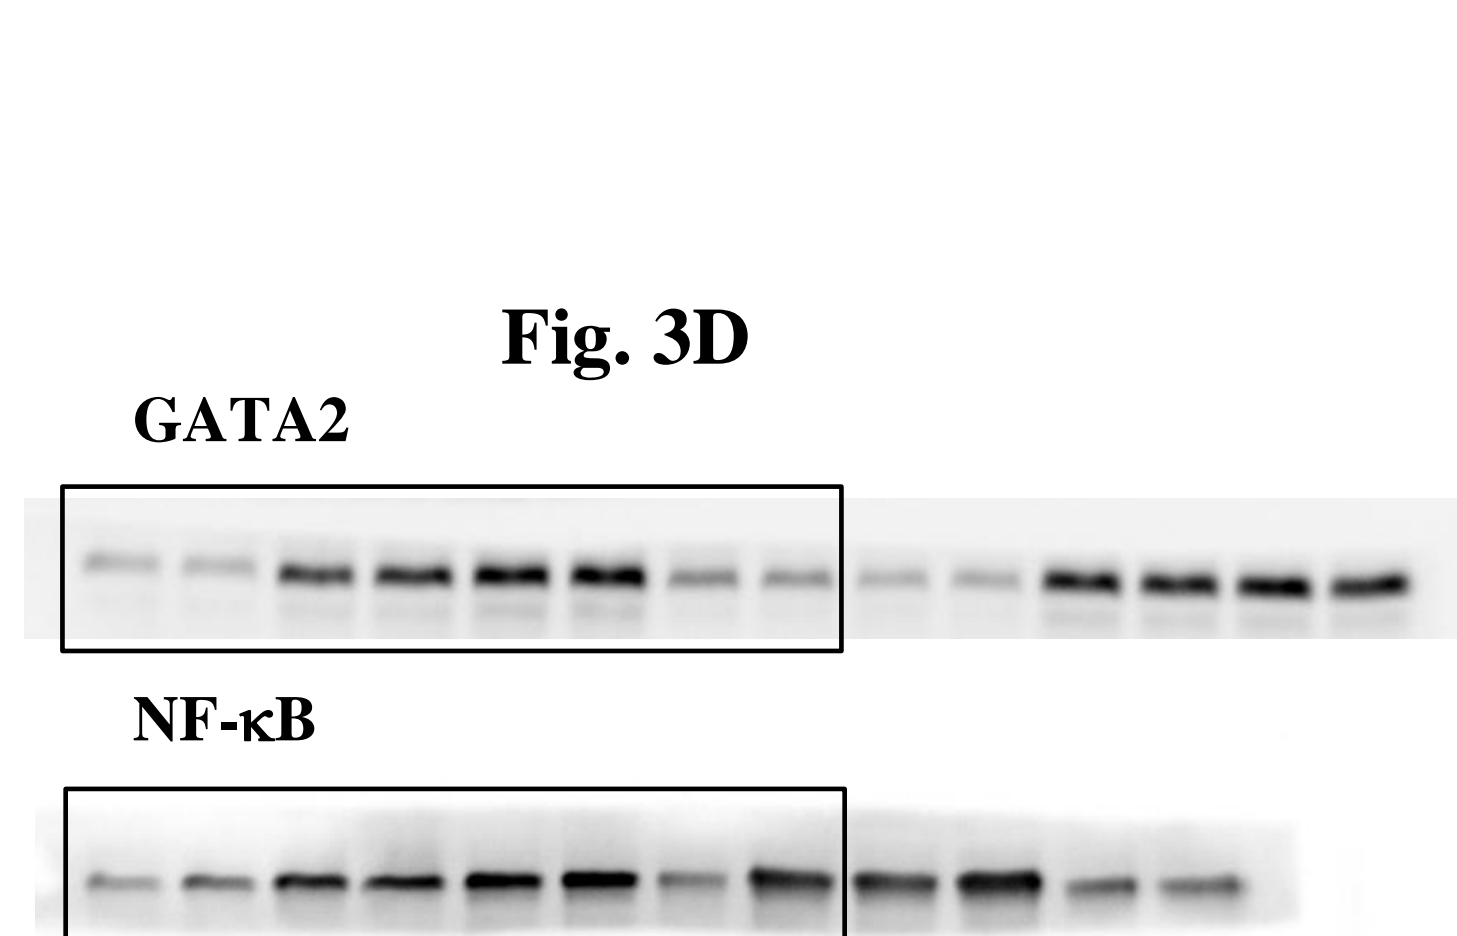

**Fig 6.D**

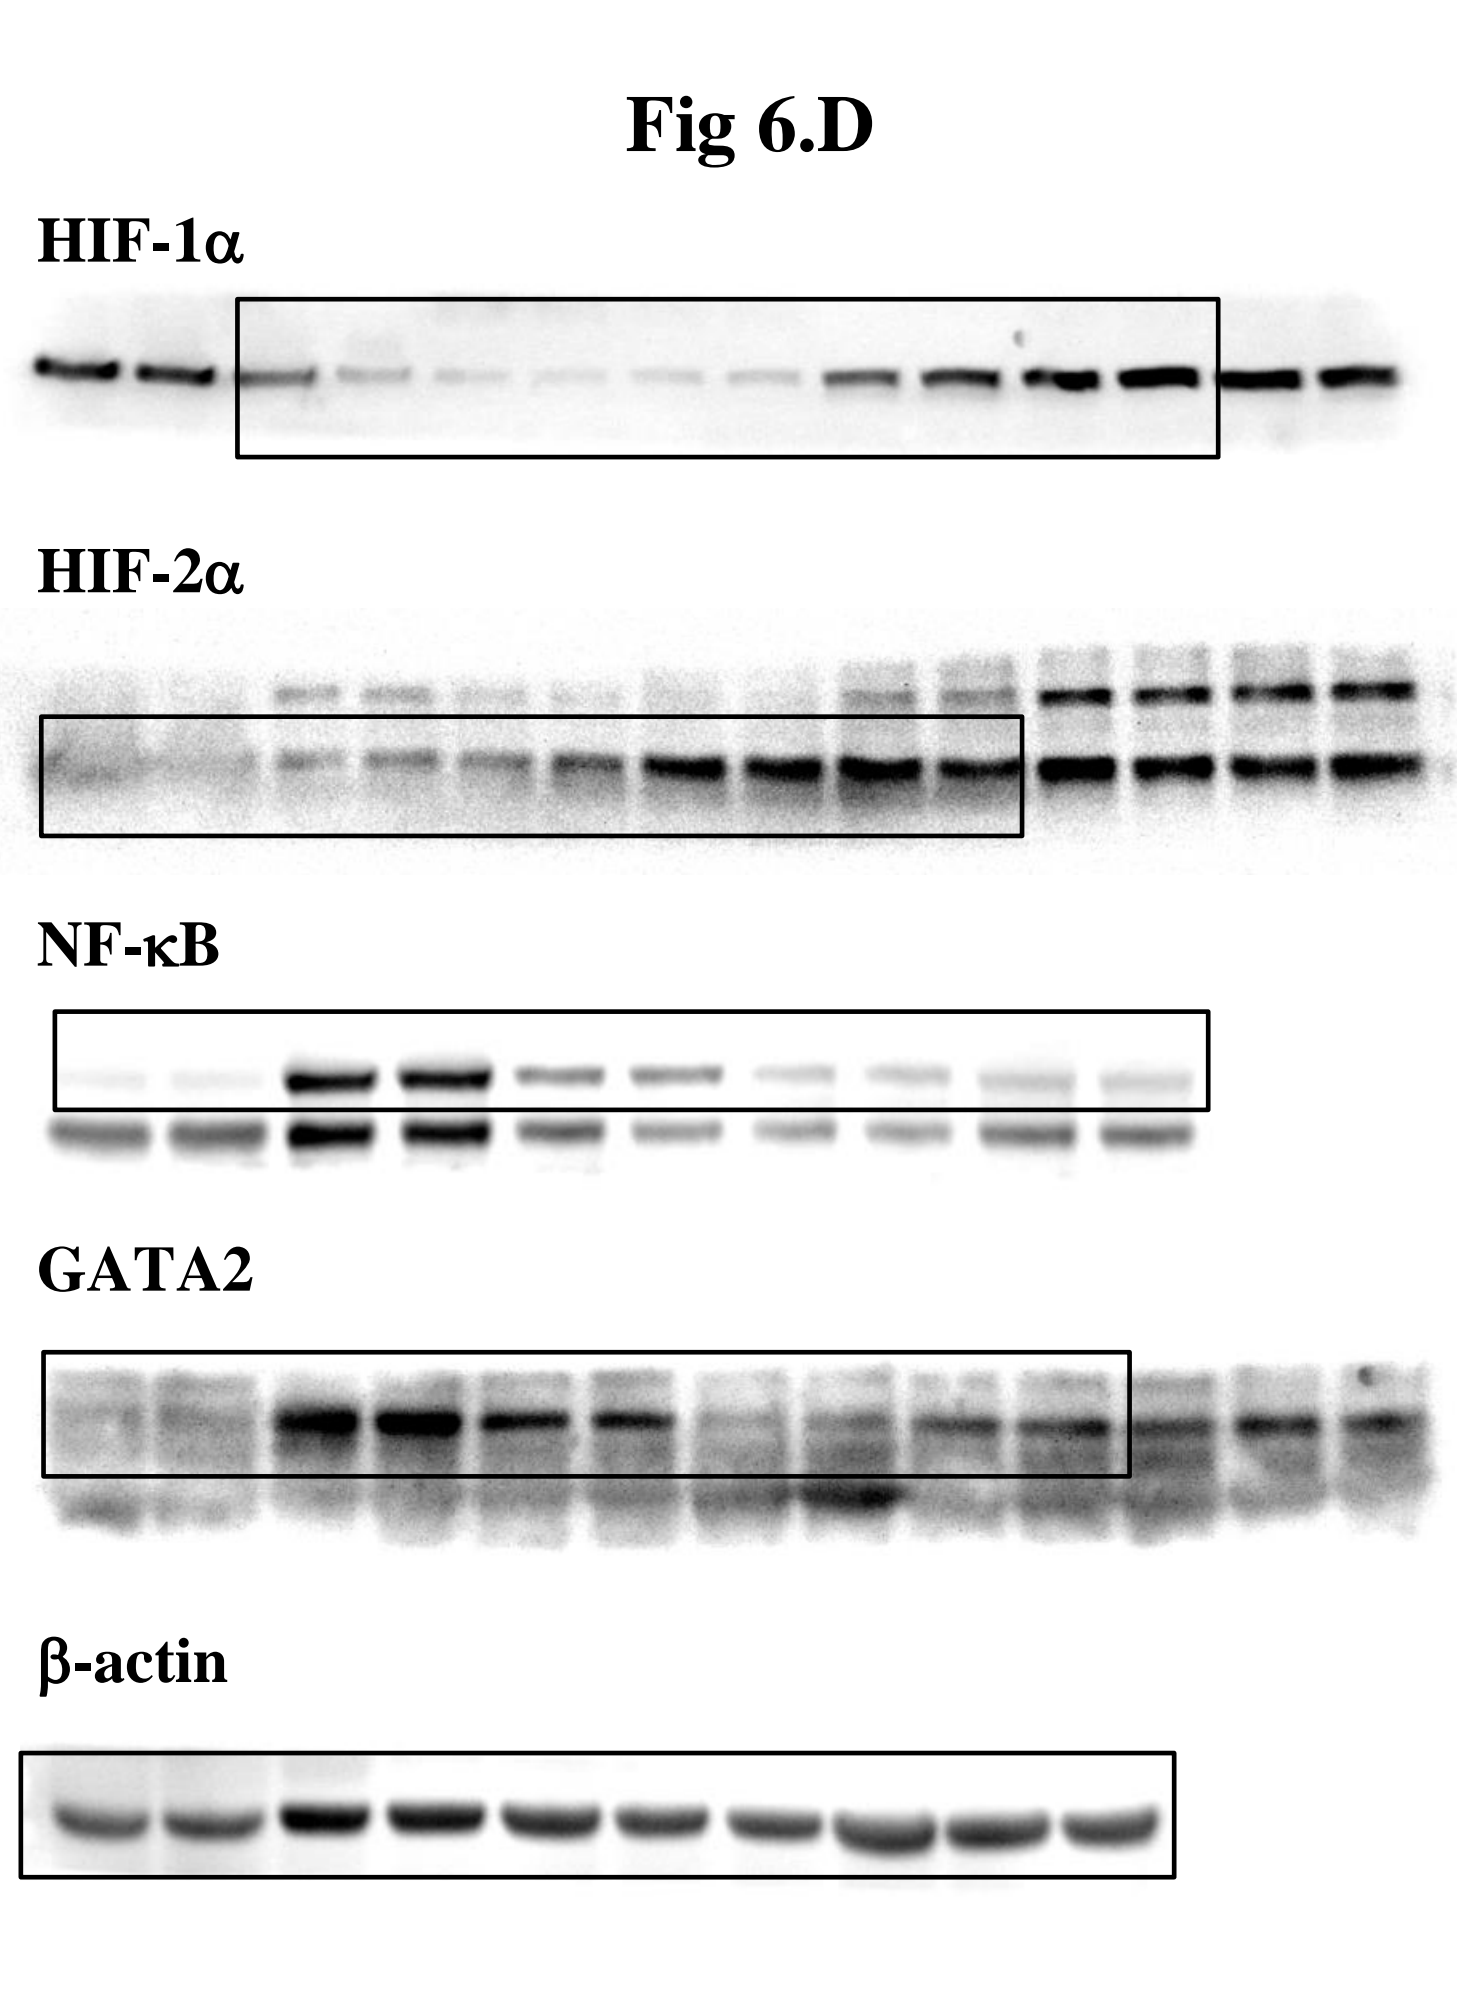

**Fig 6.E**

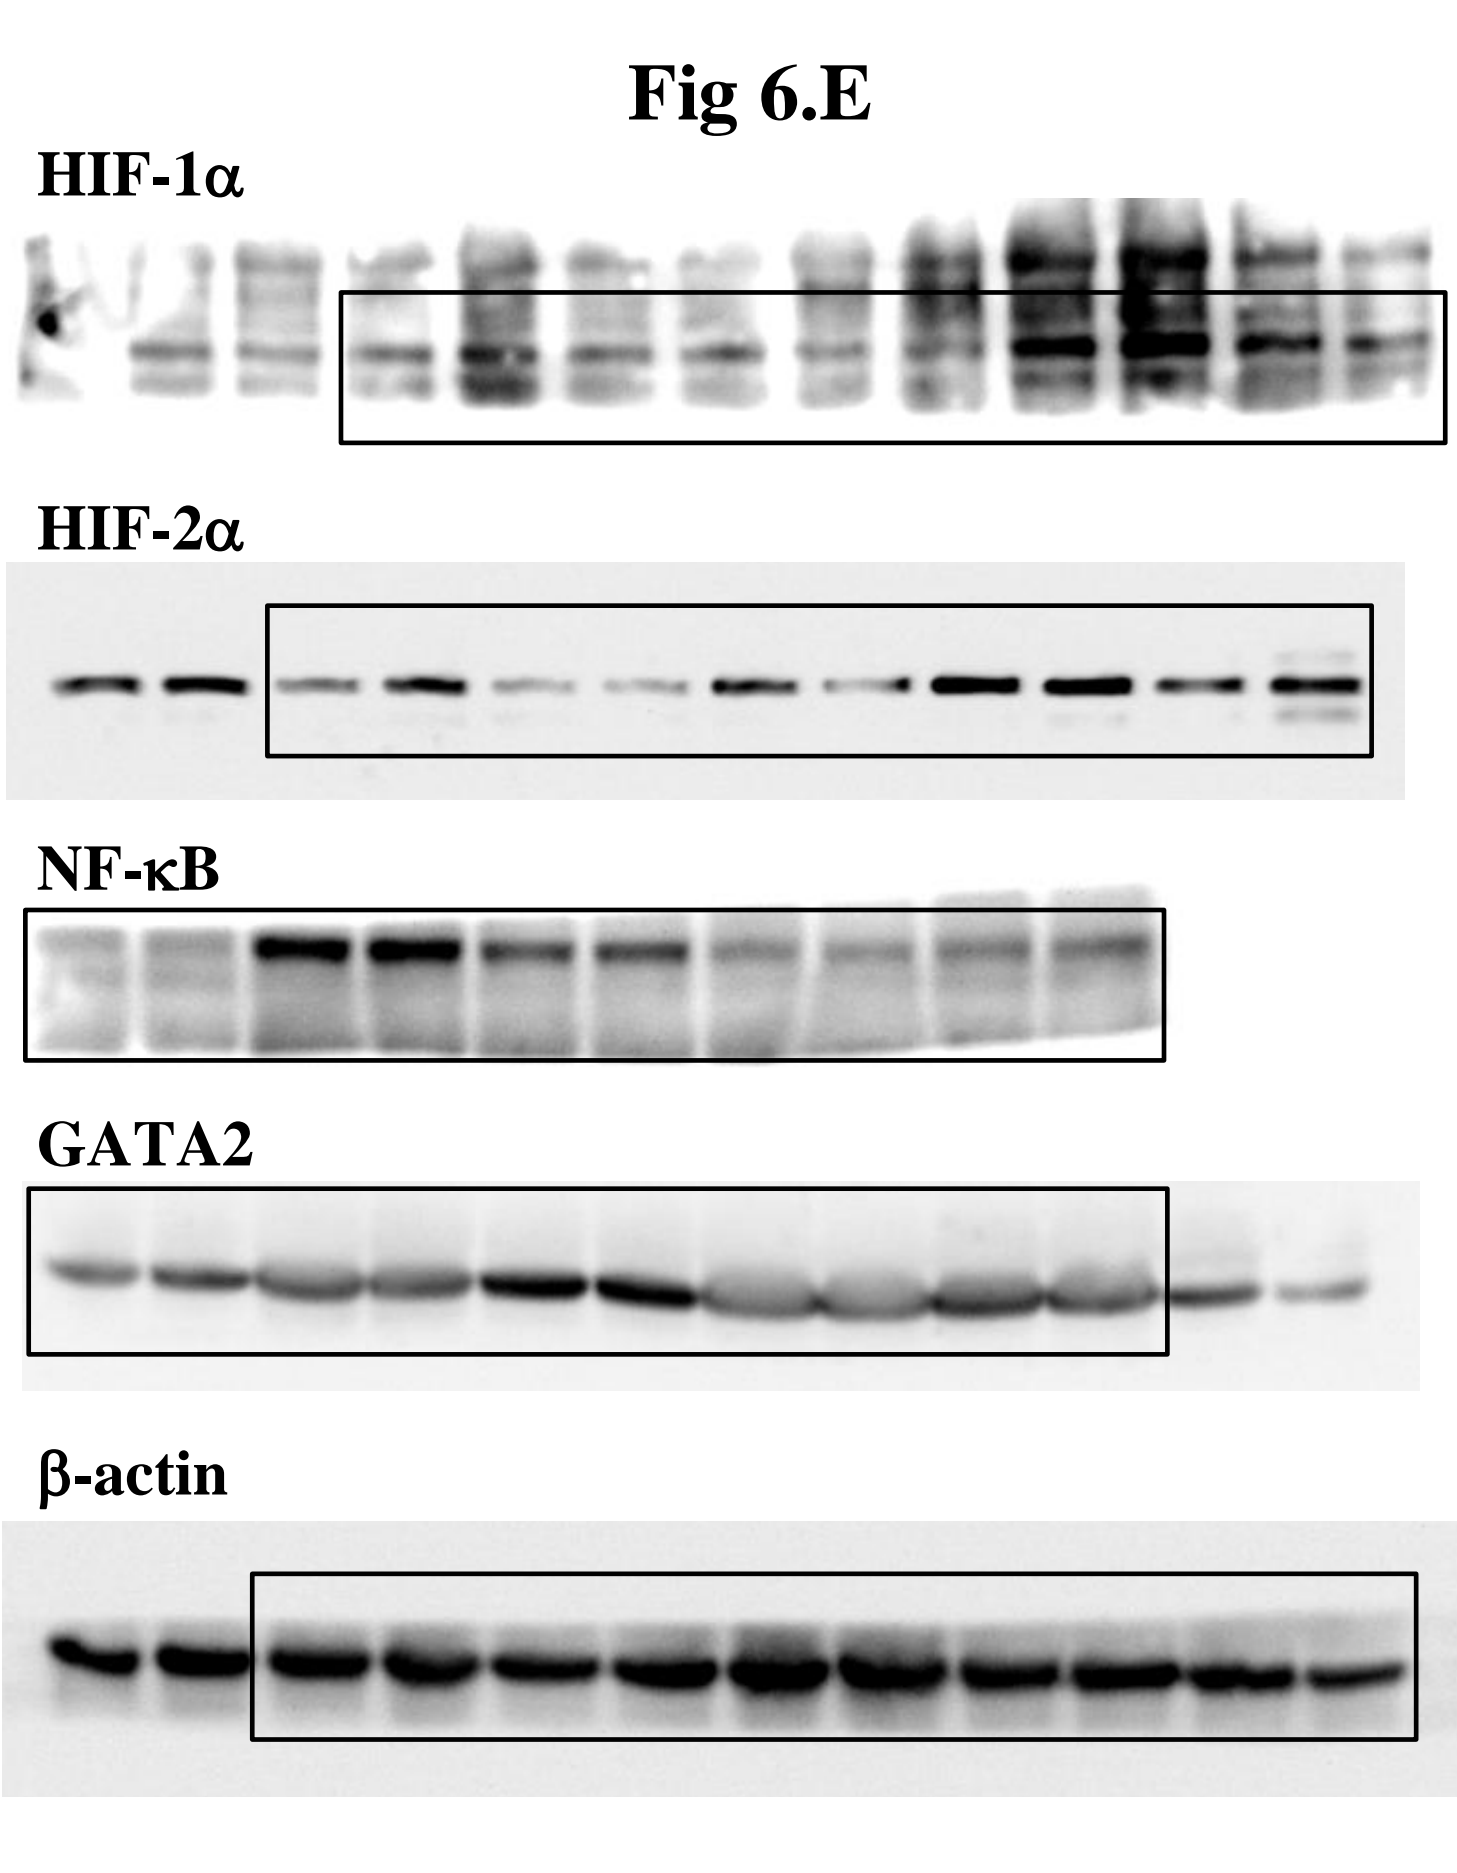

**Fig. 7B**

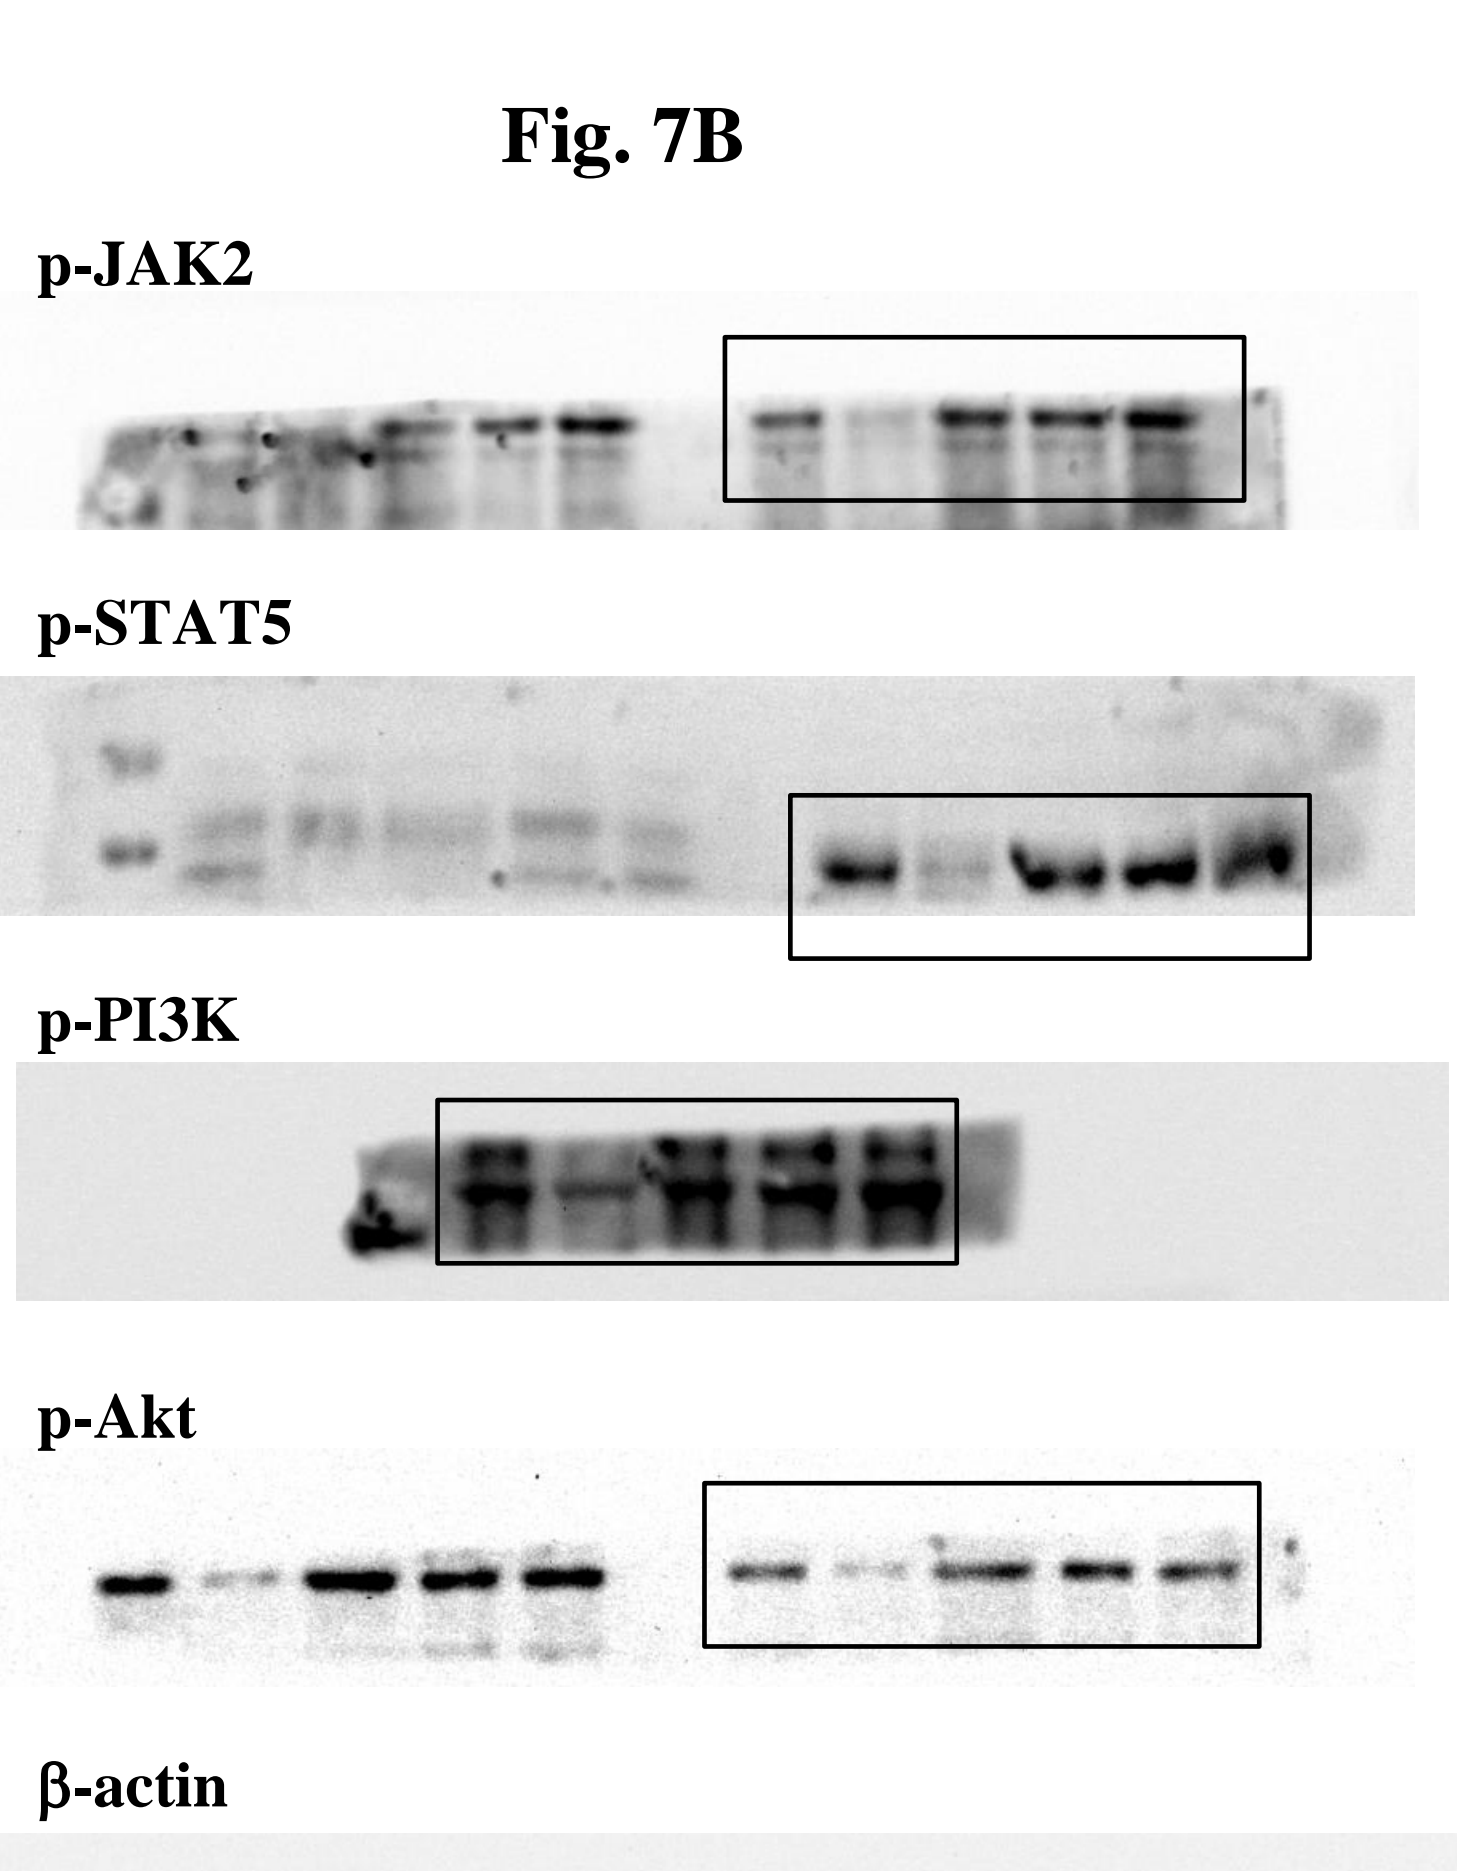

**Fig 8.D**

**p-STAT3**

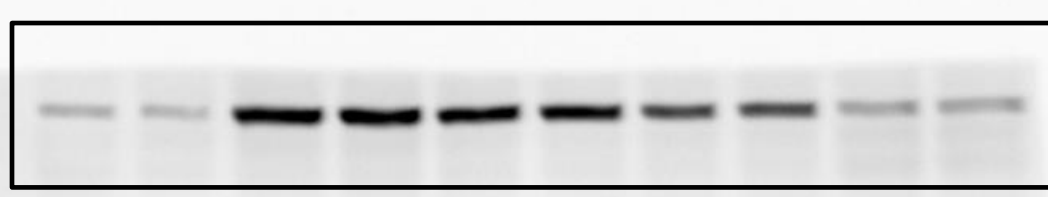

**p-SMAD1/5/8**

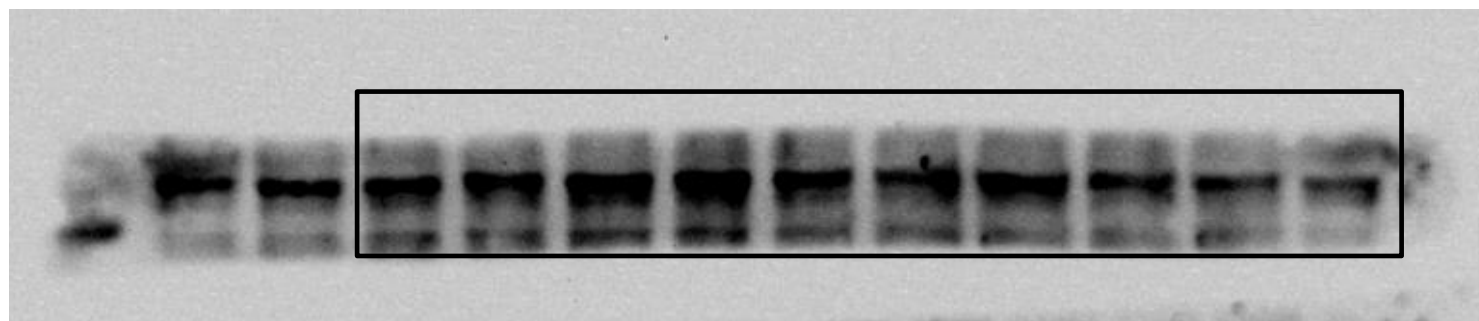

**$\beta$ -actin**

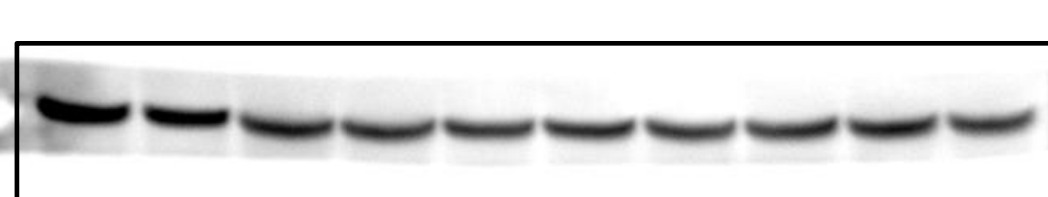

**Fig 8.F**

**Spleen**

**ferritin**

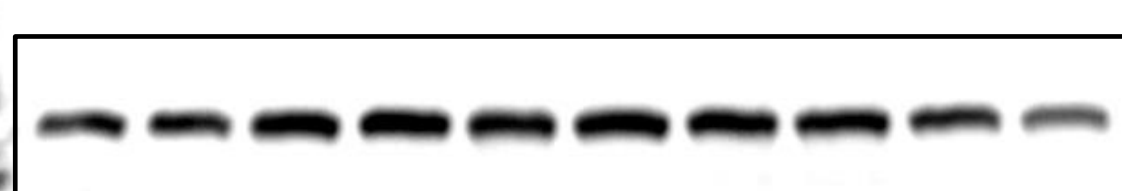

**ferroportin**

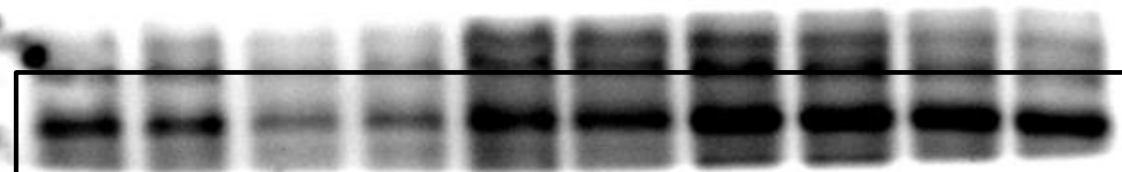

**$\beta$ -actin**

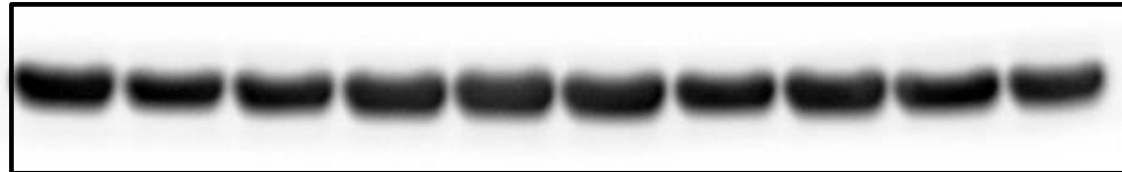

**Liver**

**ferritin**

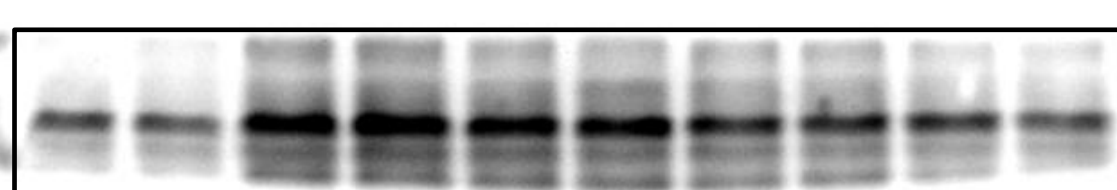

**ferroportin**

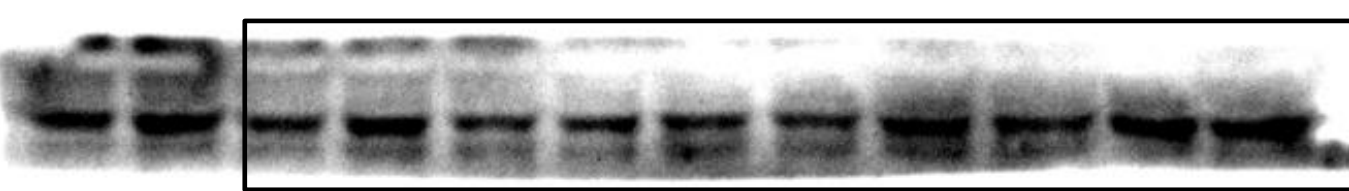

**$\beta$ -actin**

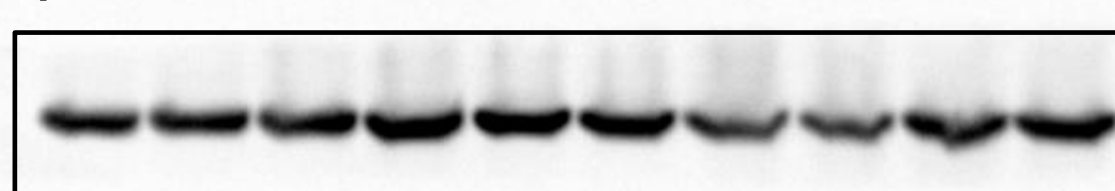

**Supplemental Fig. S2**

**NF- $\kappa$ B**

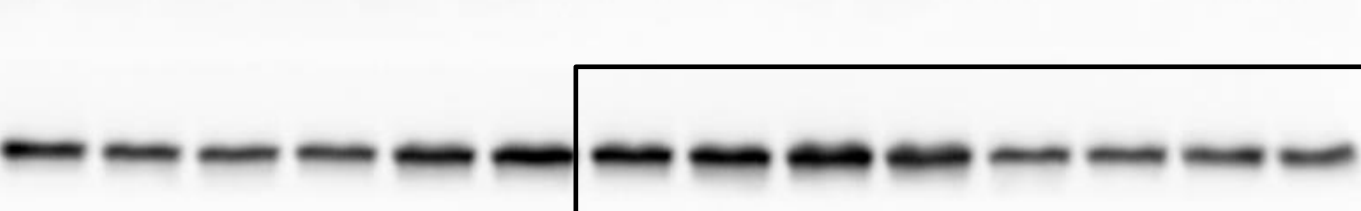

**GATA2**

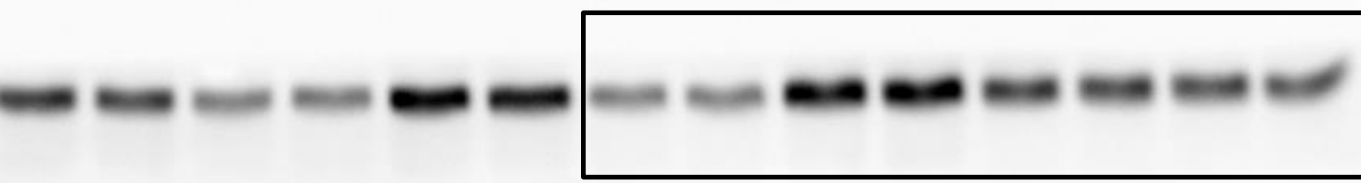

**Histone H3.1**

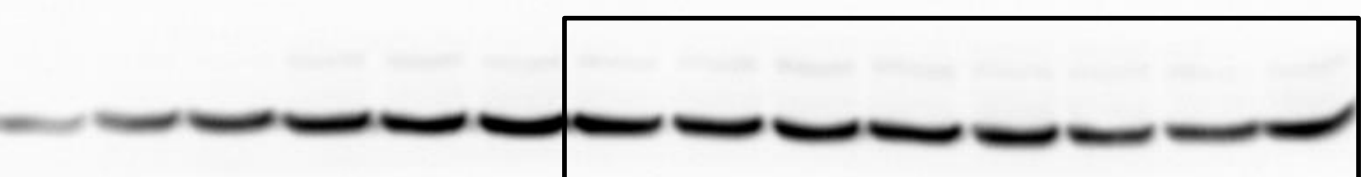

Supplement: Data_Sheet_1.pdf [file Data_Sheet_1.pdf]
