# Supplementary material for: Correction of Anemia in Chronic Kidney Disease With Angelica sinensis Polysaccharide via Restoring EPO Production and Improving Iron Availability
Source: PubMed Central journal article supplement (PMC6079227; doi:10.3389/fphar.2018.00803), 2018-07-31
Supplement: Image_2.pdf [file Image_2.pdf]

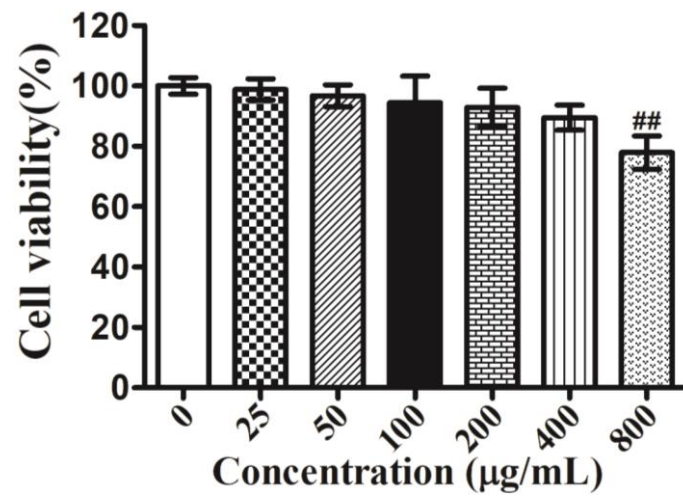

**Supplemental Figure S2. Cytotoxicology of ASP in the Hep3B cell lines.** The cytotoxicity test of ASP against Hep3B cells was performed by MTT assay. <sup>##</sup>  $P < 0.01$  compared with the “0” group.
