# Supplementary material for: Correction of Anemia in Chronic Kidney Disease With Angelica sinensis Polysaccharide via Restoring EPO Production and Improving Iron Availability
Source: PubMed Central journal article supplement (PMC6079227; doi:10.3389/fphar.2018.00803), 2018-07-31
Supplement: Image_3.pdf [file Image_3.pdf]

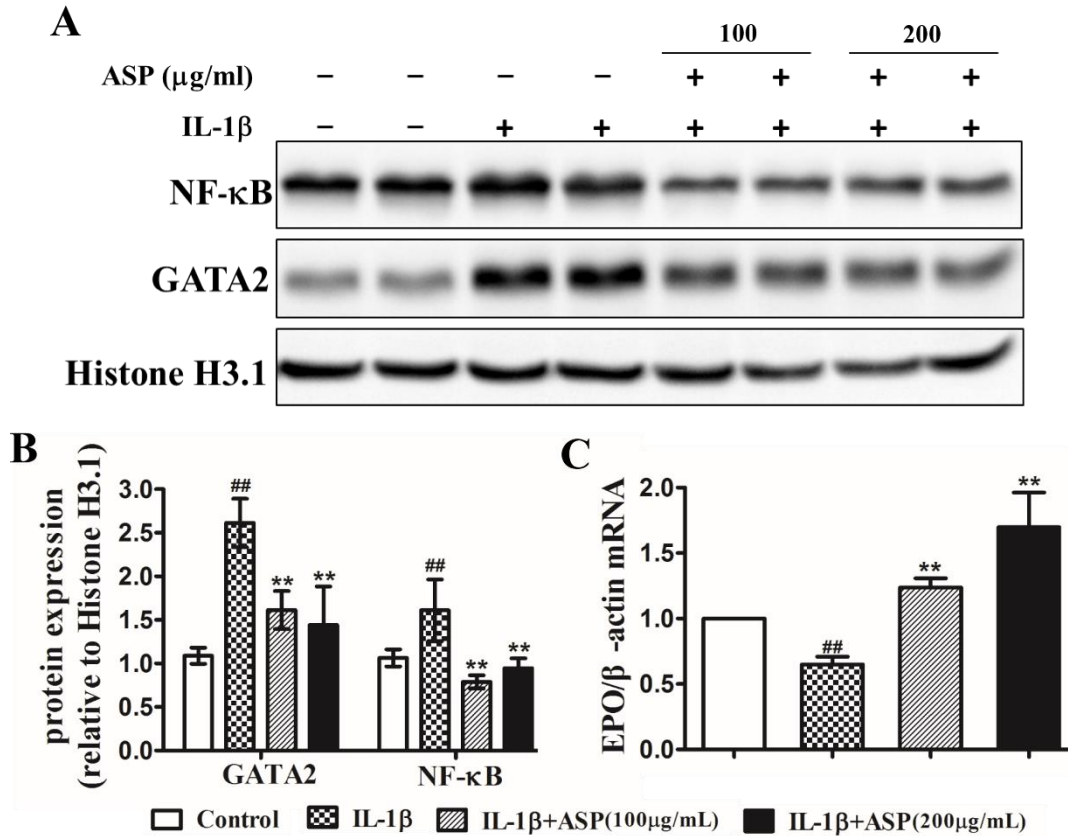

**Supplemental Figure S3. IL-1 $\beta$ -induced activation of NF- $\kappa\text{B}$  and GATA2 and repression of EPO in Hep3B cells are prevented by ASP.** (A, B and C) Hep3B cells were induced by 25 $\mu\text{g/mL}$  IL-1 $\beta$  in presence or absence of ASP (100  $\mu\text{g/mL}$ , 200  $\mu\text{g/mL}$ ). (A and B) Nuclear GATA2 and NF- $\kappa\text{B}$  expression. (C) EPO mRNA expression. Histone H3.1 served as nuclear loading control. Values are means  $\pm$  SEM from 3 independent experiments. <sup>##</sup>  $P < 0.01$  compared with the control group; \*  $P < 0.05$  and <sup>\*\*</sup>  $P < 0.01$  compared with the IL-1 $\beta$  group.
